# Supplementary material for: A promising anchor group for efficient organic dye sensitized solar cells with iodine-free redox shuttles: a theoretical evaluation
Source: Royal Society of Chemistry journal article supplement (doi:10.1039/c3ta12311a), 2013-01-01
Supplement: c3ta12311a.pdf [file c3ta12311a.pdf]

## Electronic Supplementary Information

# A promising anchor group for efficient organic dye sensitized solar cells with iodine-free redox shuttles: a theoretical evaluation

Ji Zhang<sup>†</sup>, Hai-Bin Li<sup>†</sup>, Jian-Zhao Zhang, Yong Wu, Yun Geng, Qiang Fu<sup>\*</sup>, Zhong-Min Su<sup>\*</sup>

*Institute of Functional Material Chemistry, Faculty of Chemistry, Northeast Normal University, Chang Chun 130024, Jilin, P. R. China.*

<sup>\*</sup>Corresponding author: Prof. Qiang Fu; Zhong-Min Su

E-mail: [fqiang@nenu.edu.cn](mailto:fqiang@nenu.edu.cn); [zmsu@nenu.edu.cn](mailto:zmsu@nenu.edu.cn);

<sup>†</sup>These authors contributed equally.

## Contents

|                                                                                                                                                                                                                                                                                                                                                                                                |    |
|------------------------------------------------------------------------------------------------------------------------------------------------------------------------------------------------------------------------------------------------------------------------------------------------------------------------------------------------------------------------------------------------|----|
| <b>1. Computational details</b> including the optimization of dye-(TiO <sub>2</sub> ) <sub>48</sub> systems by Siesta, calculating E <sub>ads</sub> , assessing ΔE <sub>CB</sub> , charge displacement curve and the average dye electrostatic potential.....                                                                                                                                  | S3 |
| <b>2. Figures</b>                                                                                                                                                                                                                                                                                                                                                                              |    |
| <b>Fig. S1</b> Initial structure of (TiO <sub>2</sub> ) <sub>48</sub> cluster in side and top view.....                                                                                                                                                                                                                                                                                        | S5 |
| <b>Fig. S2</b> Calculated absorption spectra of the free organic dyes in CH <sub>2</sub> Cl <sub>2</sub> solution at TD-CAM-B3LYP/6-31+G*//B3LYP/6-31G* level of theory.....                                                                                                                                                                                                                   | S5 |
| <b>Fig. S3</b> Optimized geometrical structures of different adsorption modes by Siesta. ....                                                                                                                                                                                                                                                                                                  | S5 |
| <b>Fig. S4</b> Total and Partial Density of States (DOS) for <b>2</b> adsorbed on (TiO <sub>2</sub> ) <sub>48</sub> cluster. (black solid line) (TiO <sub>2</sub> ) <sub>48</sub> cluster DOS, (blue dash line) PDOS, (TiO <sub>2</sub> ) <sub>48</sub> cluster contribution to the total DOS. The red solid lines intercepts with the energy axis correspond to the calculated CB edges. .... | S6 |
| <b>Fig. S5</b> Charge displacement curve for 1-(TiO <sub>2</sub> ) <sub>48</sub> in acetonitrile solution under C-PCM-B3LYP/SVP level.....                                                                                                                                                                                                                                                     | S6 |
| <b>Fig. S6</b> Charge displacement curve for 2-(TiO <sub>2</sub> ) <sub>48</sub> in acetonitrile solution under C-PCM-B3LYP/SVP level. ....                                                                                                                                                                                                                                                    | S6 |
| <b>Fig. S7.</b> Molecular structure of <b>3</b> . ....                                                                                                                                                                                                                                                                                                                                         | S7 |
| <b>Fig. S8</b> Frontier molecular orbitals of <b>3</b> under TD-CAM-B3LYP/6-31+G(d) level in CH <sub>2</sub> Cl <sub>2</sub> with isodensity surface of 0.02 au. ....                                                                                                                                                                                                                          | S7 |
| <b>Fig. S9</b> Total and Partial Density of States (DOS) for <b>3</b> adsorbed on (TiO <sub>2</sub> ) <sub>48</sub> cluster. (black solid line) (TiO <sub>2</sub> ) <sub>48</sub> cluster DOS, (blue dash line) PDOS, (TiO <sub>2</sub> ) <sub>48</sub> cluster contribution to the total DOS. The red solid lines intercepts with the energy axis correspond to the calculated CB edges. .... | S7 |

## 1 Computational details

### 1.1 Details about the optimization of dye-(TiO<sub>2</sub>)<sub>48</sub> systems by Siesta

The optimization of dye-(TiO<sub>2</sub>)<sub>48</sub> systems were performed by means of Siesta ab initio package, which employs norm-conserving pseudopotentials (Troullier–Martins nonlocal form) and localized atomic orbitals as basis set.<sup>1-3</sup> Standard DFT using the general gradient approximation (GGA) of Perdew, Burke, and Ernzerhof (PBE)<sup>4</sup> and double- $\zeta$  plus polarization (DZP) basis set with an equivalent real-space mesh cutoff 250 Ry were used to optimize the geometries of the studied systems in this work.

### 1.2 Details for calculating E<sub>ads</sub>

For molecular adsorption modes (M1-M3) of **1**, E<sub>[dye]</sub> is the energy of the dye molecular, and E<sub>[TiO<sub>2</sub>]</sub> is the energy of the bare TiO<sub>2</sub>, while for dissociative adsorption modes (D1-D3) of **1**, E<sub>[dye]</sub> is the energy of the dye ion without H proton with the adsorption geometry, and E<sub>[TiO<sub>2</sub>]</sub> is the energy of the TiO<sub>2</sub> with H proton. All the energies mentioned above were calculated at C-PCM-B3LYP/SVP level of theory in acetonitrile solution.

### 1.3 Details for assessing $\Delta E_{CB}$

We evaluated the Partial Density of States (PDOS) profiles on TiO<sub>2</sub> at the C-PCM-B3LYP/SVP level of theory to determine the extent of  $\Delta E_{CB}$  upon the sensitizer adsorption. A linear fit of the low energies profile in a range from 20%-80% of the maximum height was performed and the intercept of this line with x energy axis was taken as CB edge.

### 1.4 Details about charge displacement curve

The electron density change ( $\Delta\rho$ ) during the formation of the dye-TiO<sub>2</sub> adducts is defined as the density difference between the bound system and its separated fragments at the same position. And the charge displacement (CD) along the z direction defined as:<sup>5,6</sup>

$$\Delta q(z) = \int_{-\infty}^{\infty} dx \int_{-\infty}^{\infty} dy \int_{-\infty}^z \Delta\rho(x, y, z') dz' \quad (1)$$

where  $\Delta\rho$  is the electron density difference as defined above.  $\Delta q(z)$  measures the electron charge transferred from the right to the left side of the perpendicular plan through z upon formation of the adduct at each point z along the chosen z axis. In our system, two fragments were defined, i.e. the deprotonated dye (negatively charged) and the protonated TiO<sub>2</sub> (positively charged). The CD curve shows the rearrangement of both dye and semiconductor's electron density as a consequence of the dye/surface interaction, and the maximum of the CD curve reflects the charge transferred from the sensitizer to the semiconductor when they have strong interaction.

### 1.5 Details about the average dye electrostatic potential (V<sub>EL</sub>)

The average dye electrostatic potential on the TiO<sub>2</sub> surface was evaluated by the following relation:<sup>5</sup>

$$V_{EL} = \frac{1}{n_{Ti}} \sum_{i=1}^{n_{Ti}} \sum_{j=1}^{n_q} \frac{q_j}{r_{ij}} \quad (2)$$

where  $q_j$  is the  $j_{th}$  of the  $n_q$  dye point charge. Here we used Merz-Kollman<sup>7, 8</sup> method to calculate the atomic charge distributions, which has been demonstrated to be the optimal atomic charge model for studying through-space charge-transfer excitations by Jacquemin et al.<sup>9</sup> And  $r_{ij}$  represent the distances between these of charges and each of the titanium atoms in the superficial layer of TiO<sub>2</sub> cluster.

#### Reference

1. P. Ordejón, E. Artacho and J. M. Soler, *Phys. Rev. B*, 1996, **53**, 10441-10444.
2. D. Sánchez-Portal, P. Ordejón, E. Artacho and J. M. Soler, *Int. J. Quantum Chem.*, 1997, **65**, 453-461.
3. M. S. José, A. Emilio, D. G. Julian, G. Alberto, J. Javier, O. Pablo and S.-P. Daniel, *J. Phys.: Condens. Matter*, 2002, **14**, 2745.
4. J. P. Perdew, K. Burke and M. Ernzerhof, *Phys. Rev. Lett.*, 1996, **77**, 3865-3868.
5. E. Ronca, M. Pastore, L. Belpassi, F. Tarantelli and F. De Angelis, *Energy Environ. Sci.*, 2013, **6**, 183-193.
6. L. Belpassi, I. Infante, F. Tarantelli and L. Visscher, *J. Am. Chem. Soc.*, 2007, **130**, 1048-1060.
7. U. C. Singh and P. A. Kollman, *J. Comput. Chem.*, 1984, **5**, 129-145.
8. B. H. Besler, K. M. Merz and P. A. Kollman, *J. Comput. Chem.*, 1990, **11**, 431-439.
9. D. Jacquemin, T. L. Bahers, C. Adamo and I. Ciofini, *Phys. Chem. Chem. Phys.*, 2012, **14**, 5383-5388.

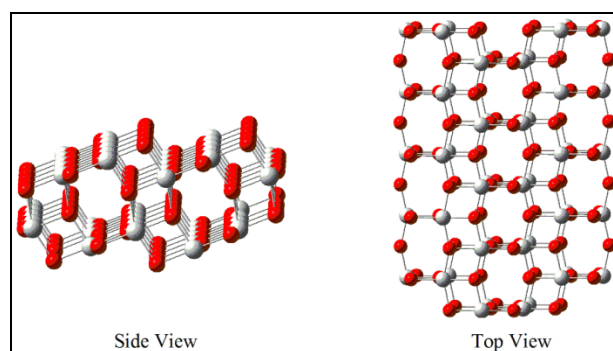

Fig. S1. Initial structure of  $(\text{TiO}_2)_{48}$  cluster in side and top view.

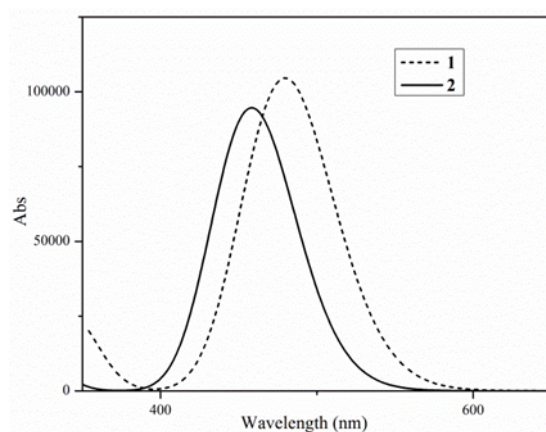

Fig. S2. Calculated absorption spectra of the free organic dyes in  $\text{CH}_2\text{Cl}_2$  solution at TD-CAM-B3LYP/6-31+G\*\*/B3LYP/6-31G\* level of theory.

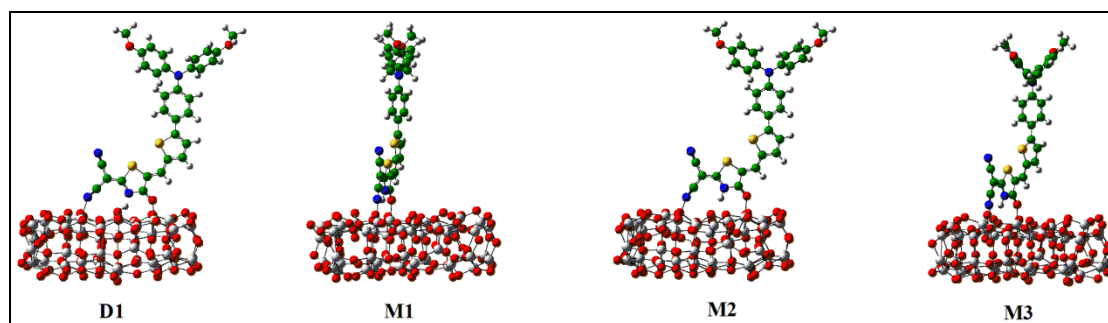

Fig. S3. Optimized geometrical structures of different adsorption modes by Siesta.

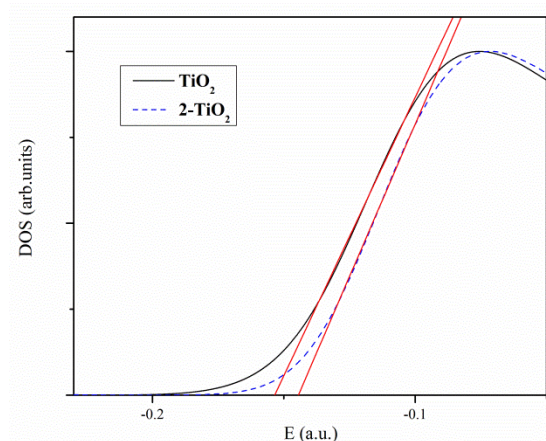

**Fig. S4.** Total and Partial Density of States (DOS) for **2** adsorbed on  $(\text{TiO}_2)_{48}$  cluster. (black solid line)  $(\text{TiO}_2)_{48}$  cluster DOS, (blue dash line) PDOS,  $(\text{TiO}_2)_{48}$  cluster contribution to the total DOS. The red solid lines intercepts with the energy axis correspond to the calculated CB edges.

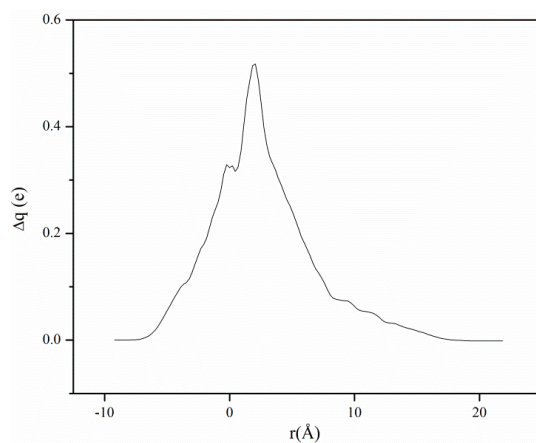

**Fig. S5.** Charge displacement curve for **1**- $(\text{TiO}_2)_{48}$  in acetonitrile solution under C-PCM-B3LYP/SVP level.

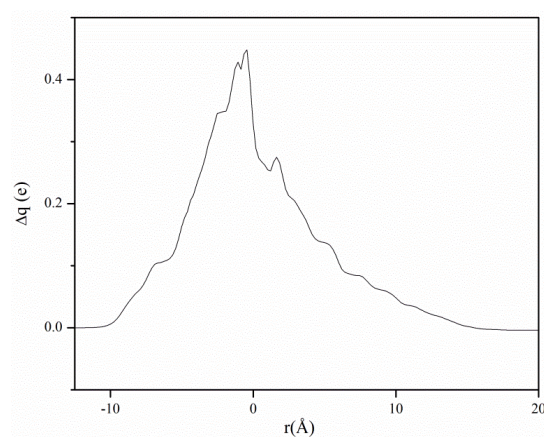

**Fig. S6.** Charge displacement curve for **2**- $(\text{TiO}_2)_{48}$  in acetonitrile solution under C-PCM-B3LYP/SVP level.

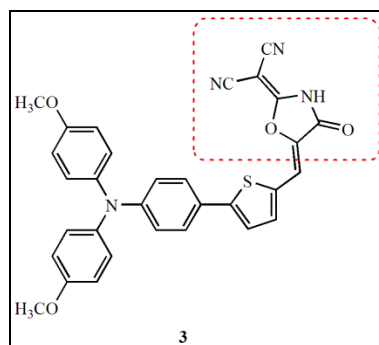

Fig. S7. Molecular structure of **3**.

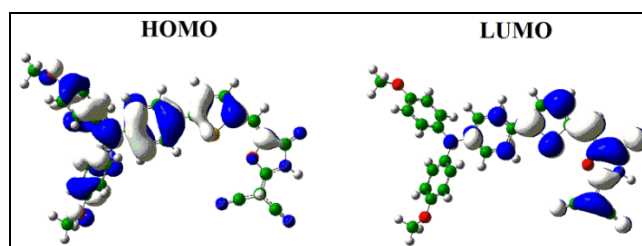

Fig. S8. Frontier molecular orbitals of **3** under TD-CAM-B3LYP/6-31+G(d) level in  $\text{CH}_2\text{Cl}_2$  with isodensity surface of 0.02 au.

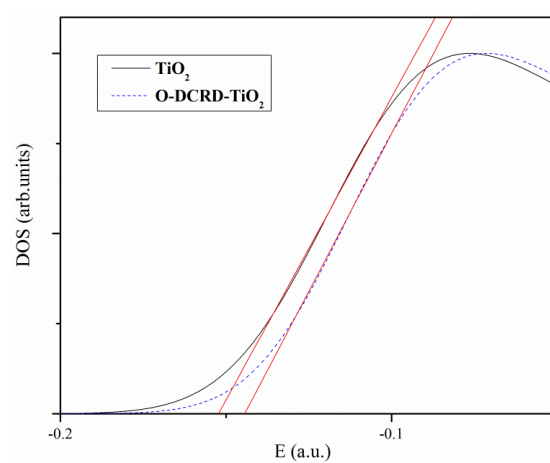

Fig. S9. Total and Partial Density of States (DOS) for **3** adsorbed on  $(\text{TiO}_2)_{48}$  cluster. (black solid line)  $(\text{TiO}_2)_{48}$  cluster DOS, (blue dash line) PDOS,  $(\text{TiO}_2)_{48}$  cluster contribution to the total DOS. The red solid lines intercepts with the energy axis correspond to the calculated CB edges.
